# Supplementary material for: Real-world assessment of immunogenicity in immunocompromised individuals following SARS-CoV-2 mRNA vaccination: a two-year follow-up of the prospective clinical trial COVAXID
Source: PubMed Central journal article supplement (PMC11663764; doi:10.1016/j.ebiom.2024.105385), 2024-10-11
Supplement: mmc1.pdf [file mmc1.pdf]

# Supplementary Figure S1

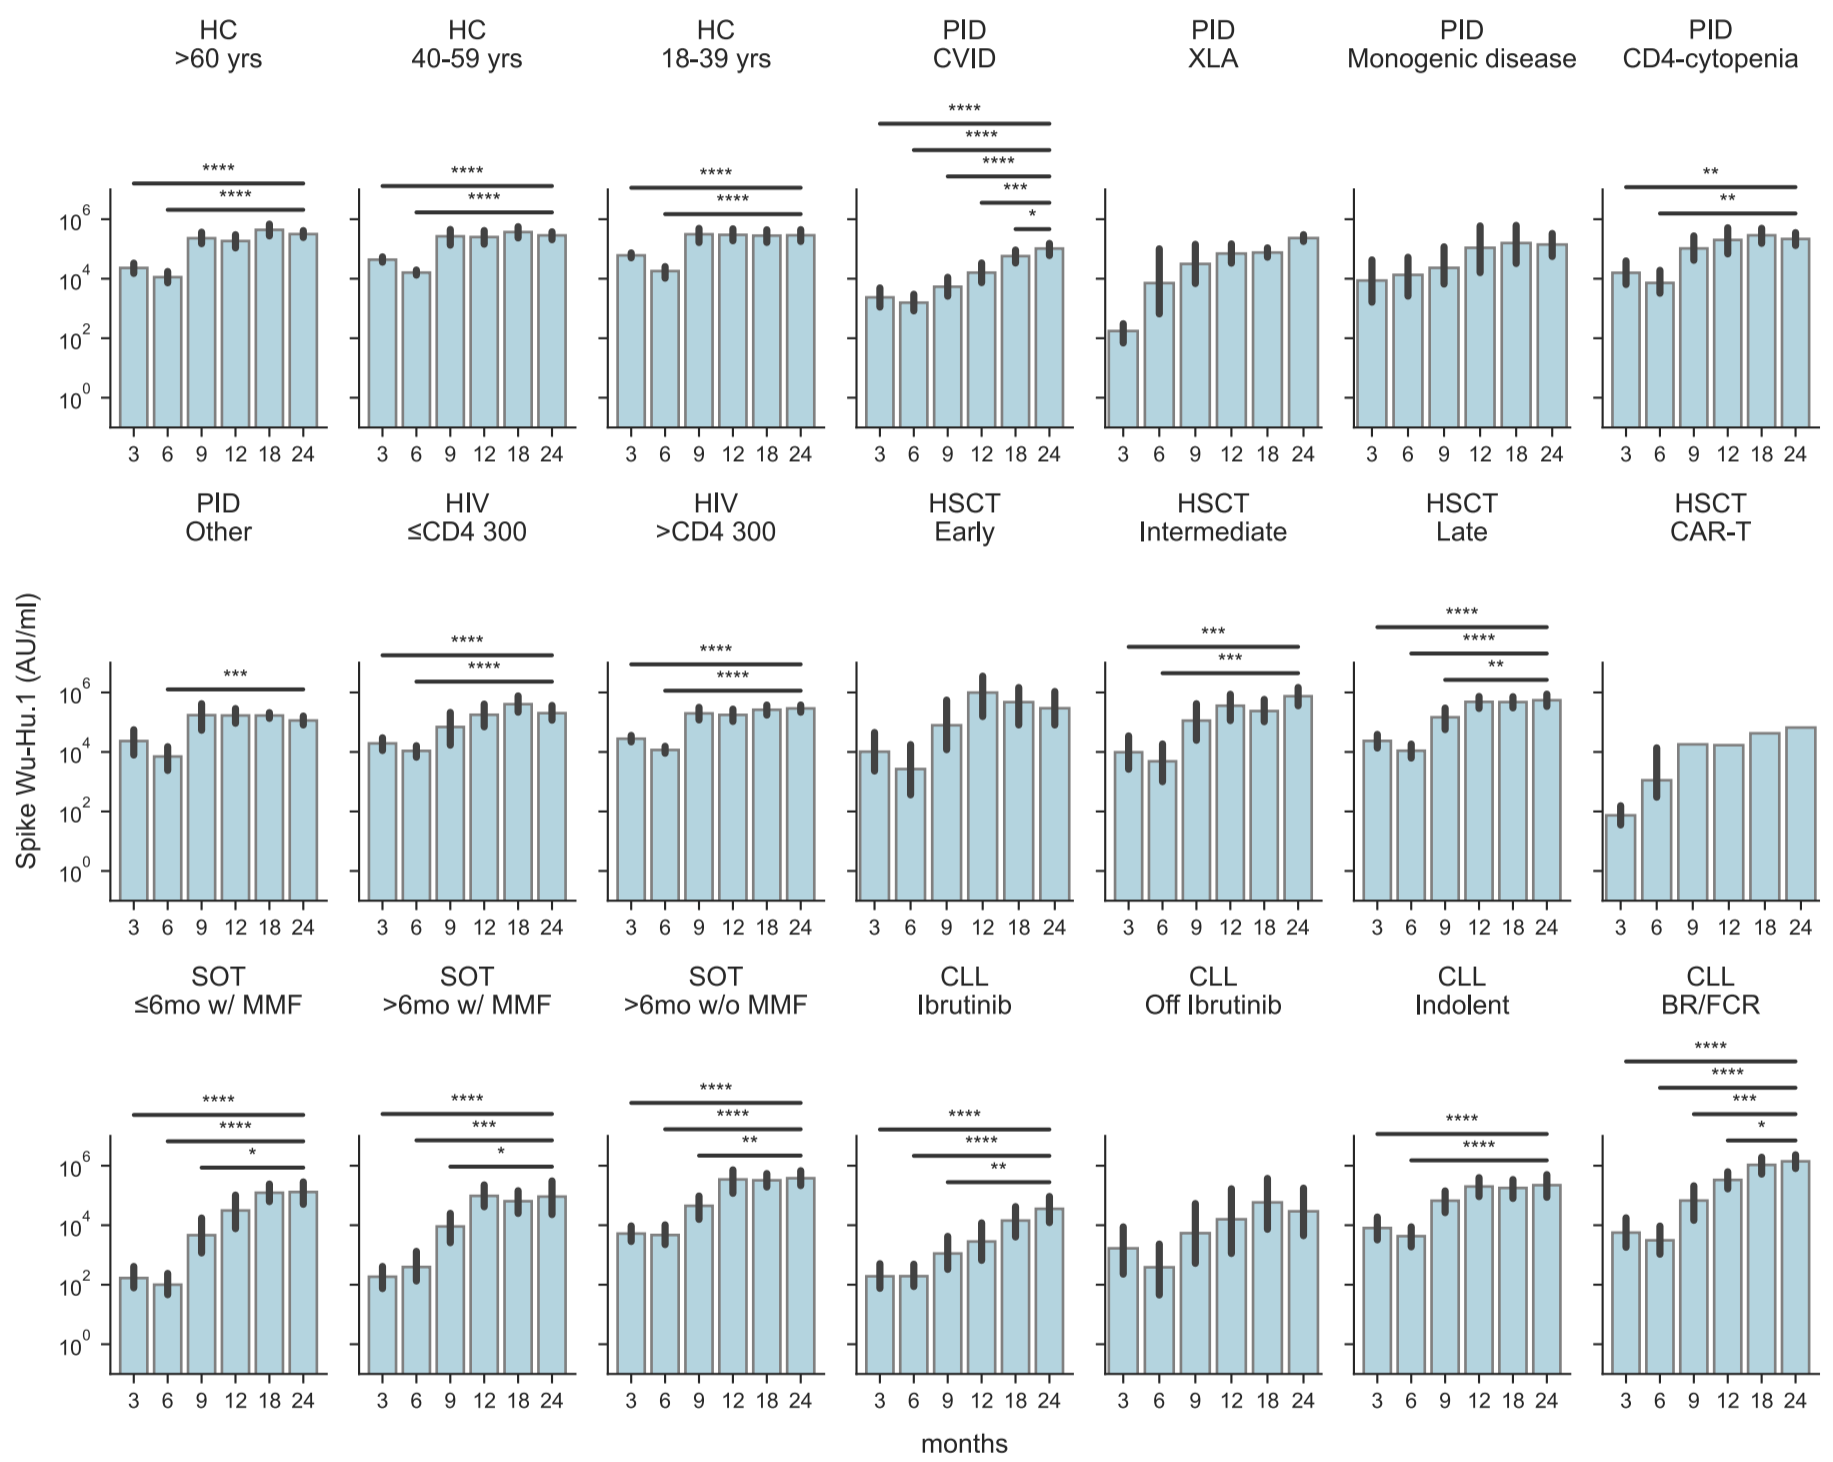

# Supplementary Figure S2

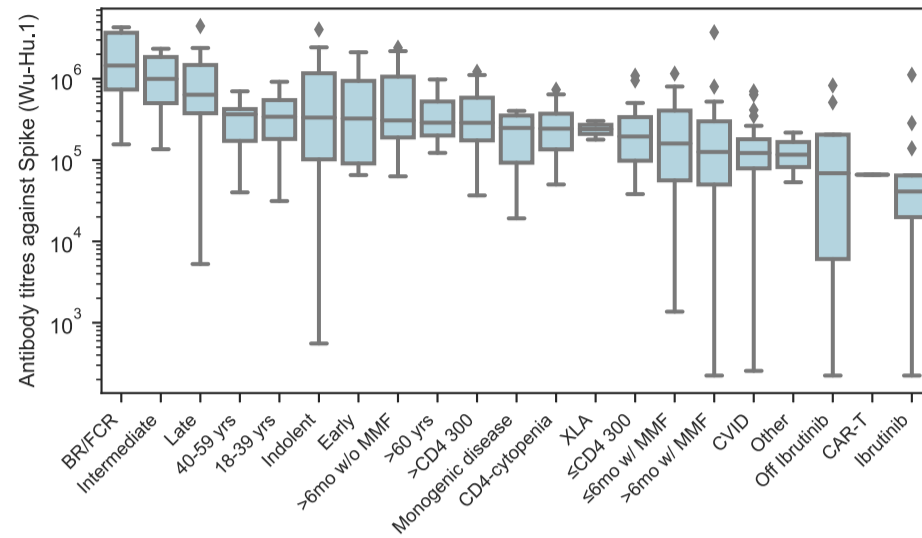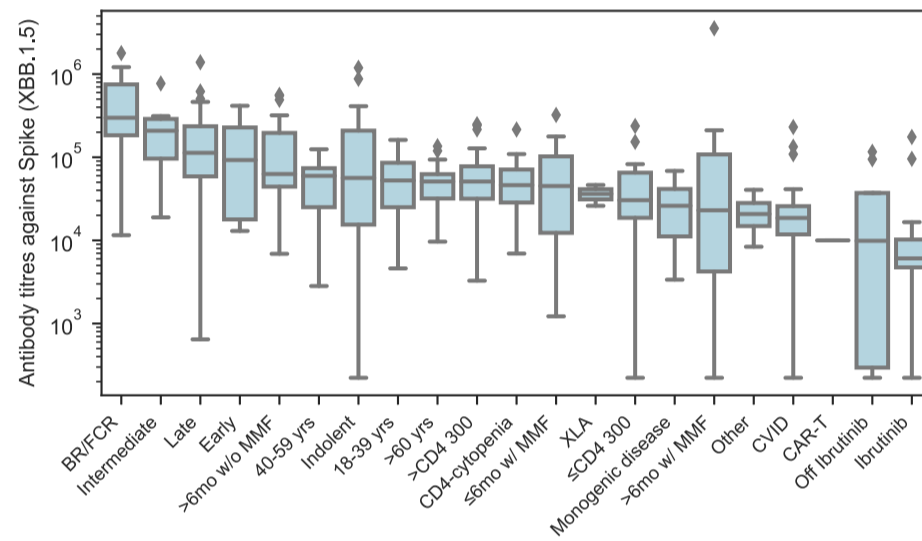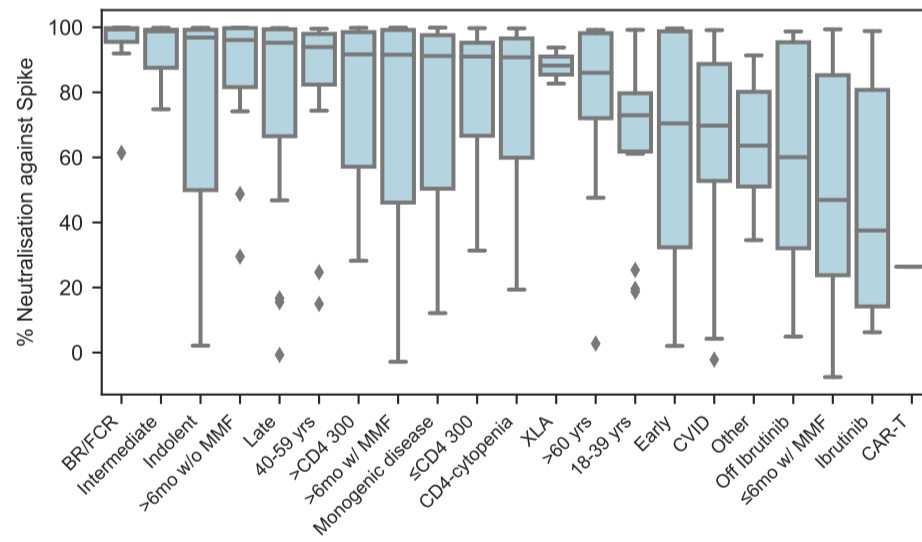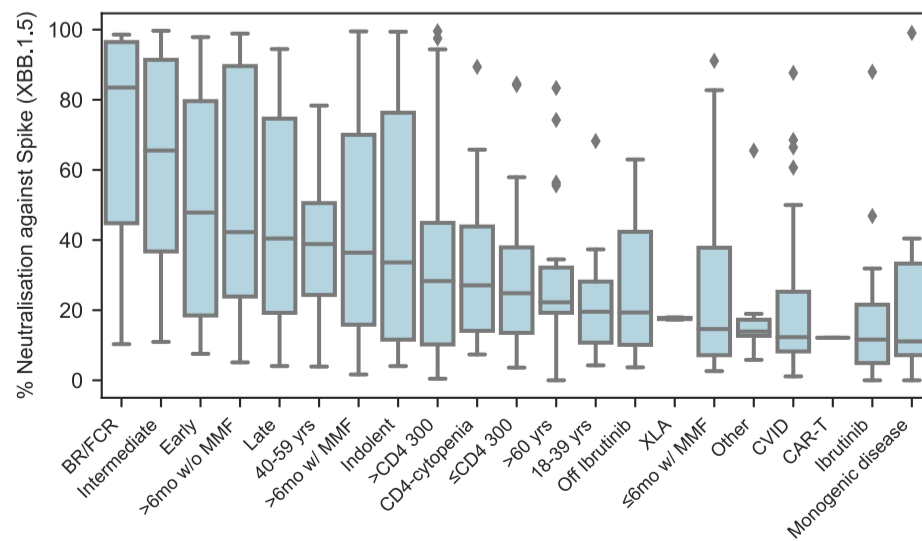

## Supplementary Figure S3

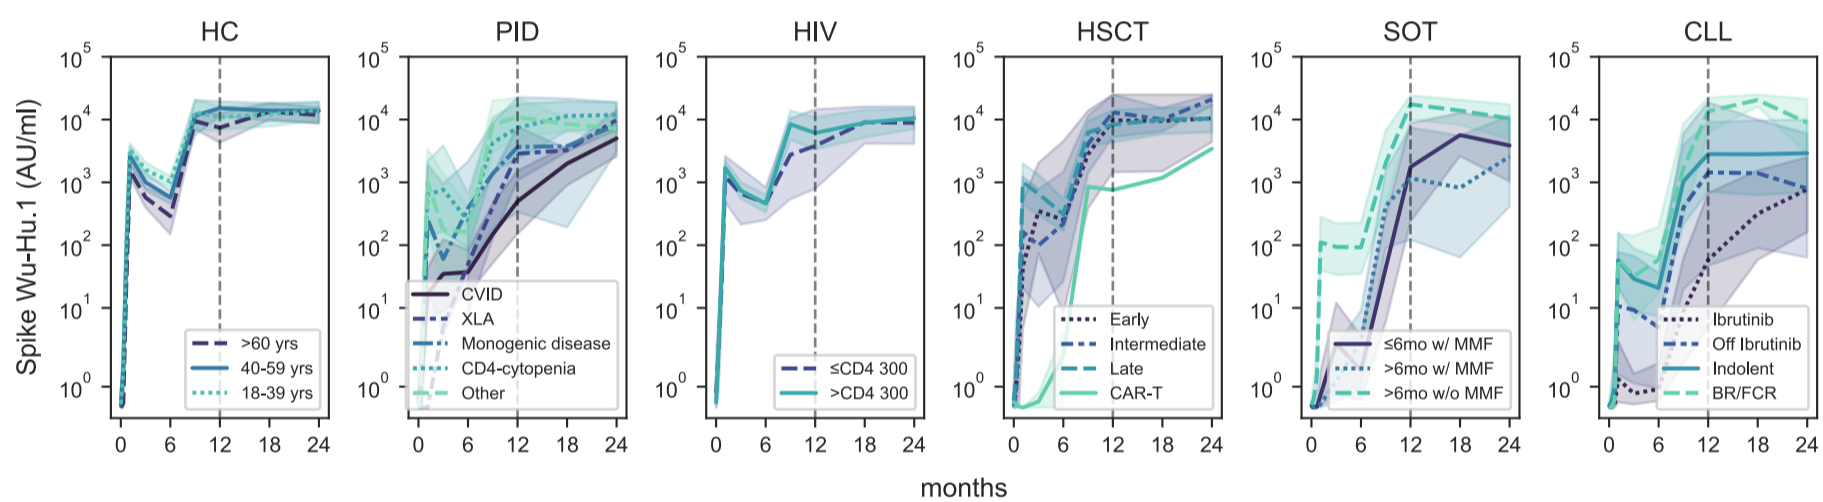

# Supplementary Figure S4

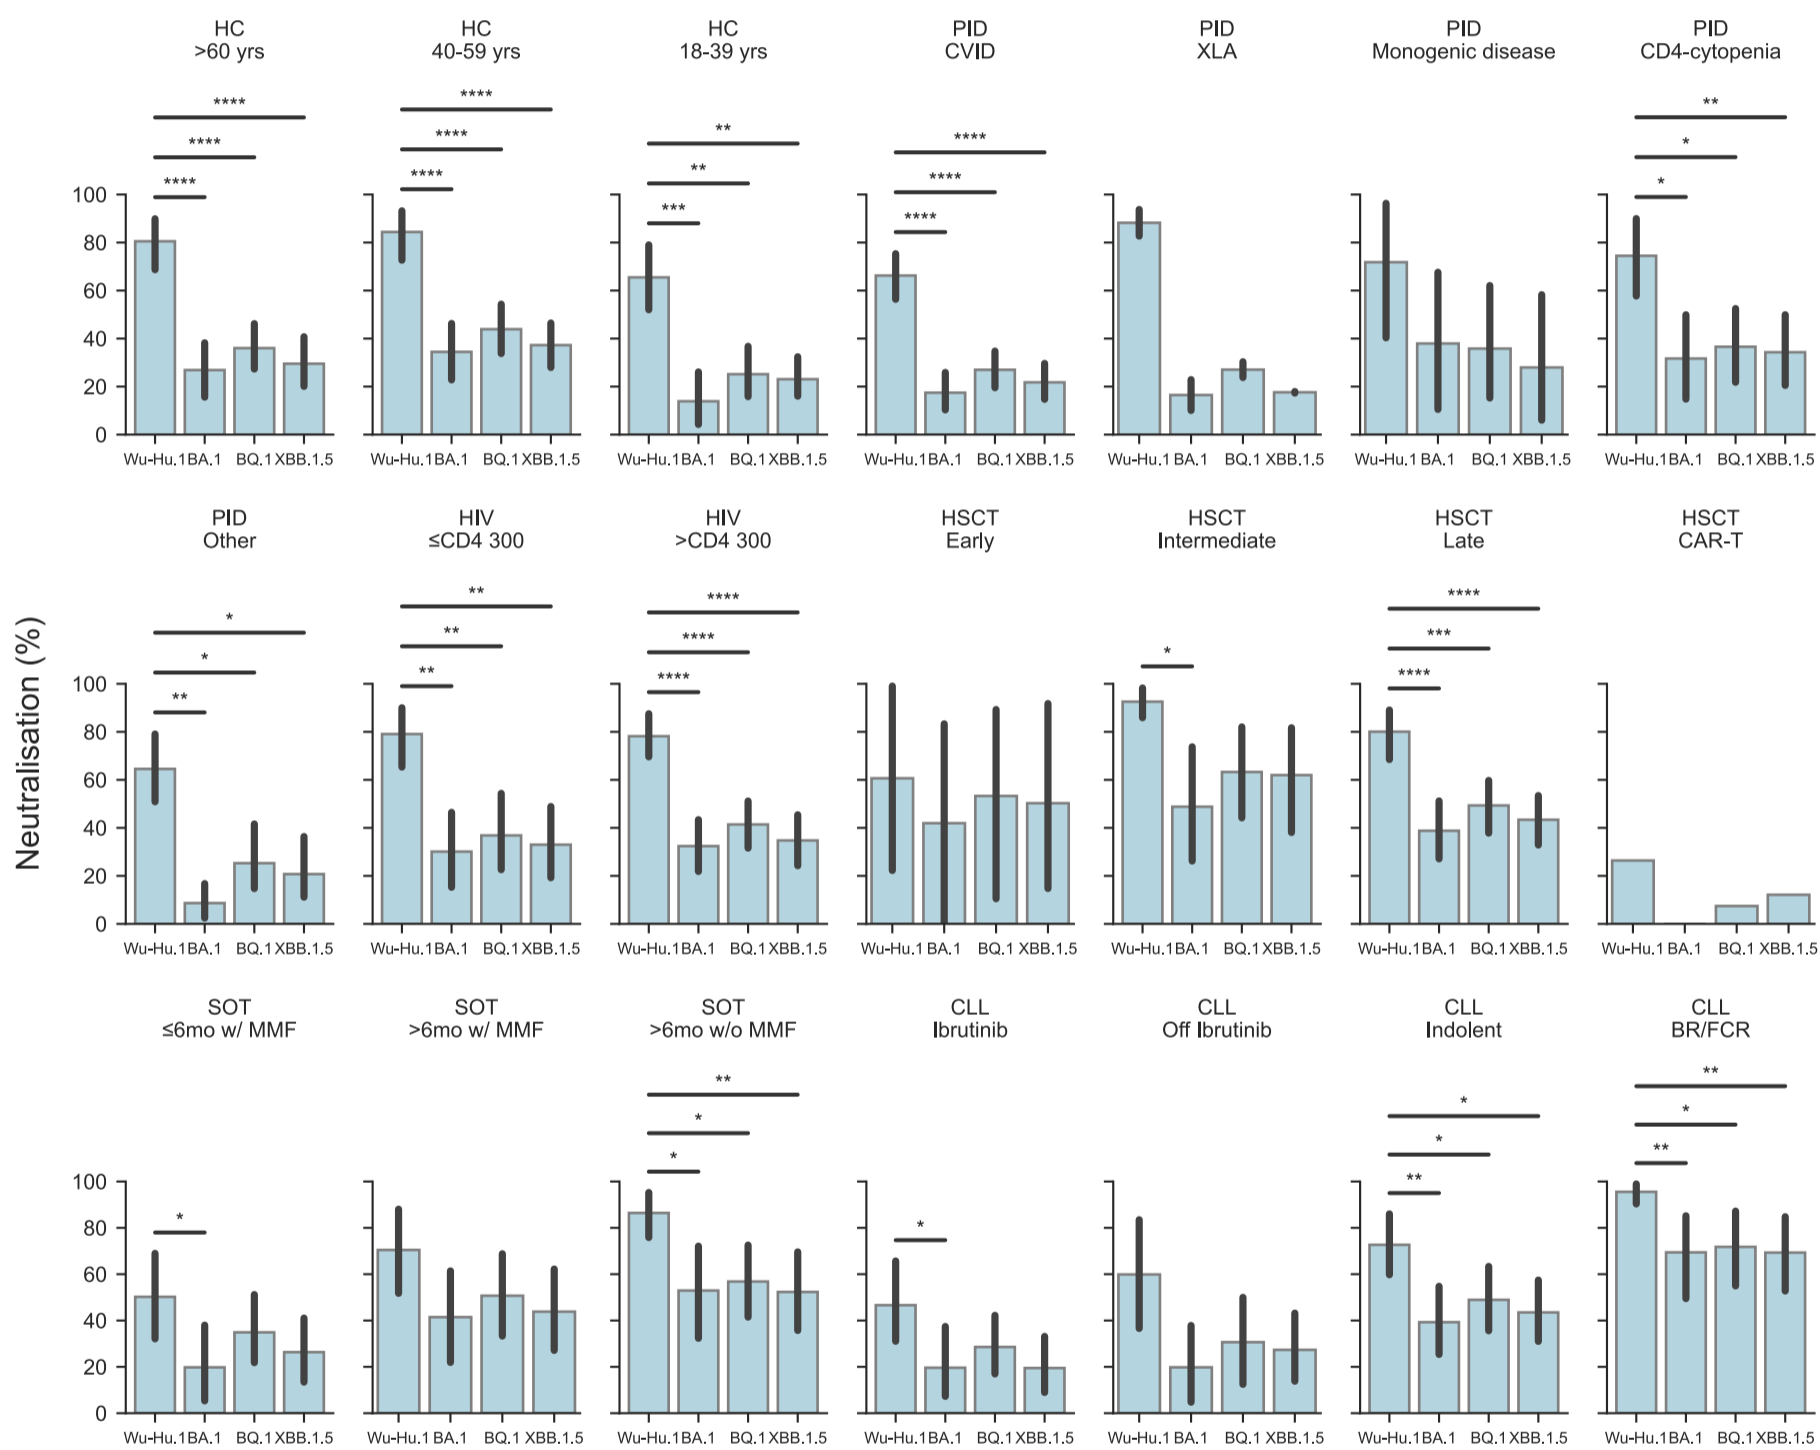

# Supplementary Figure S5

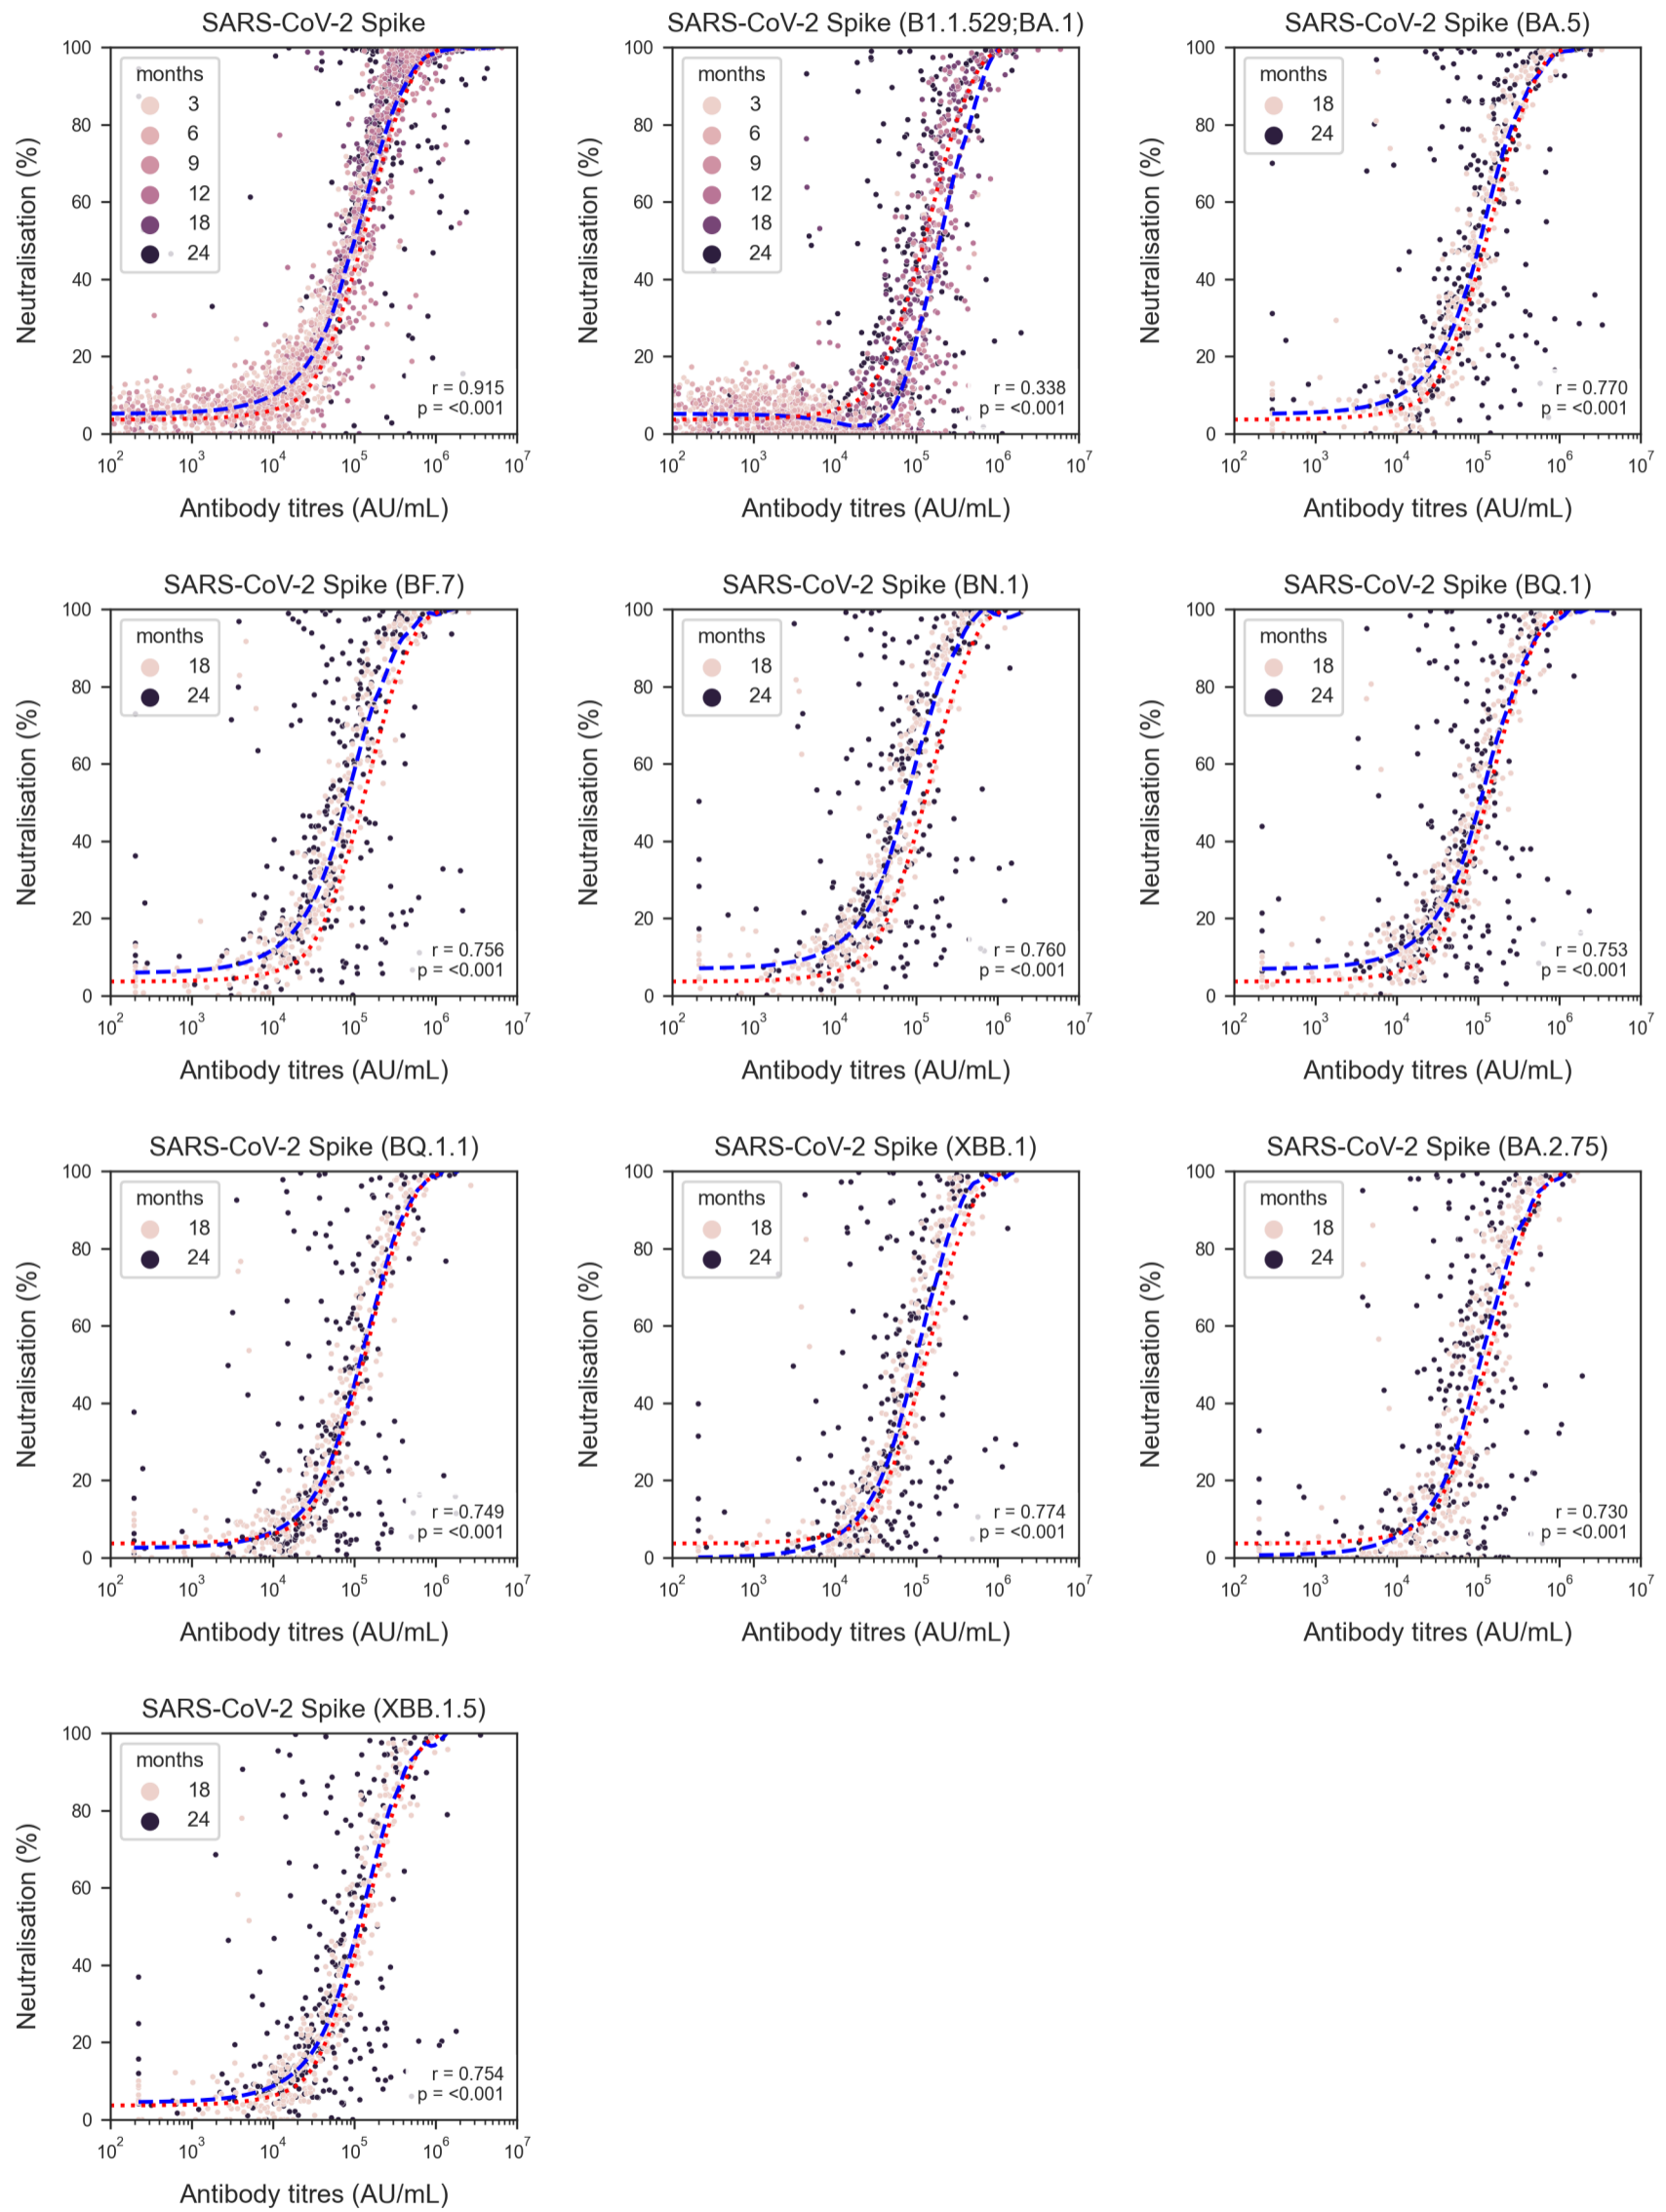

# Supplementary Figure S6

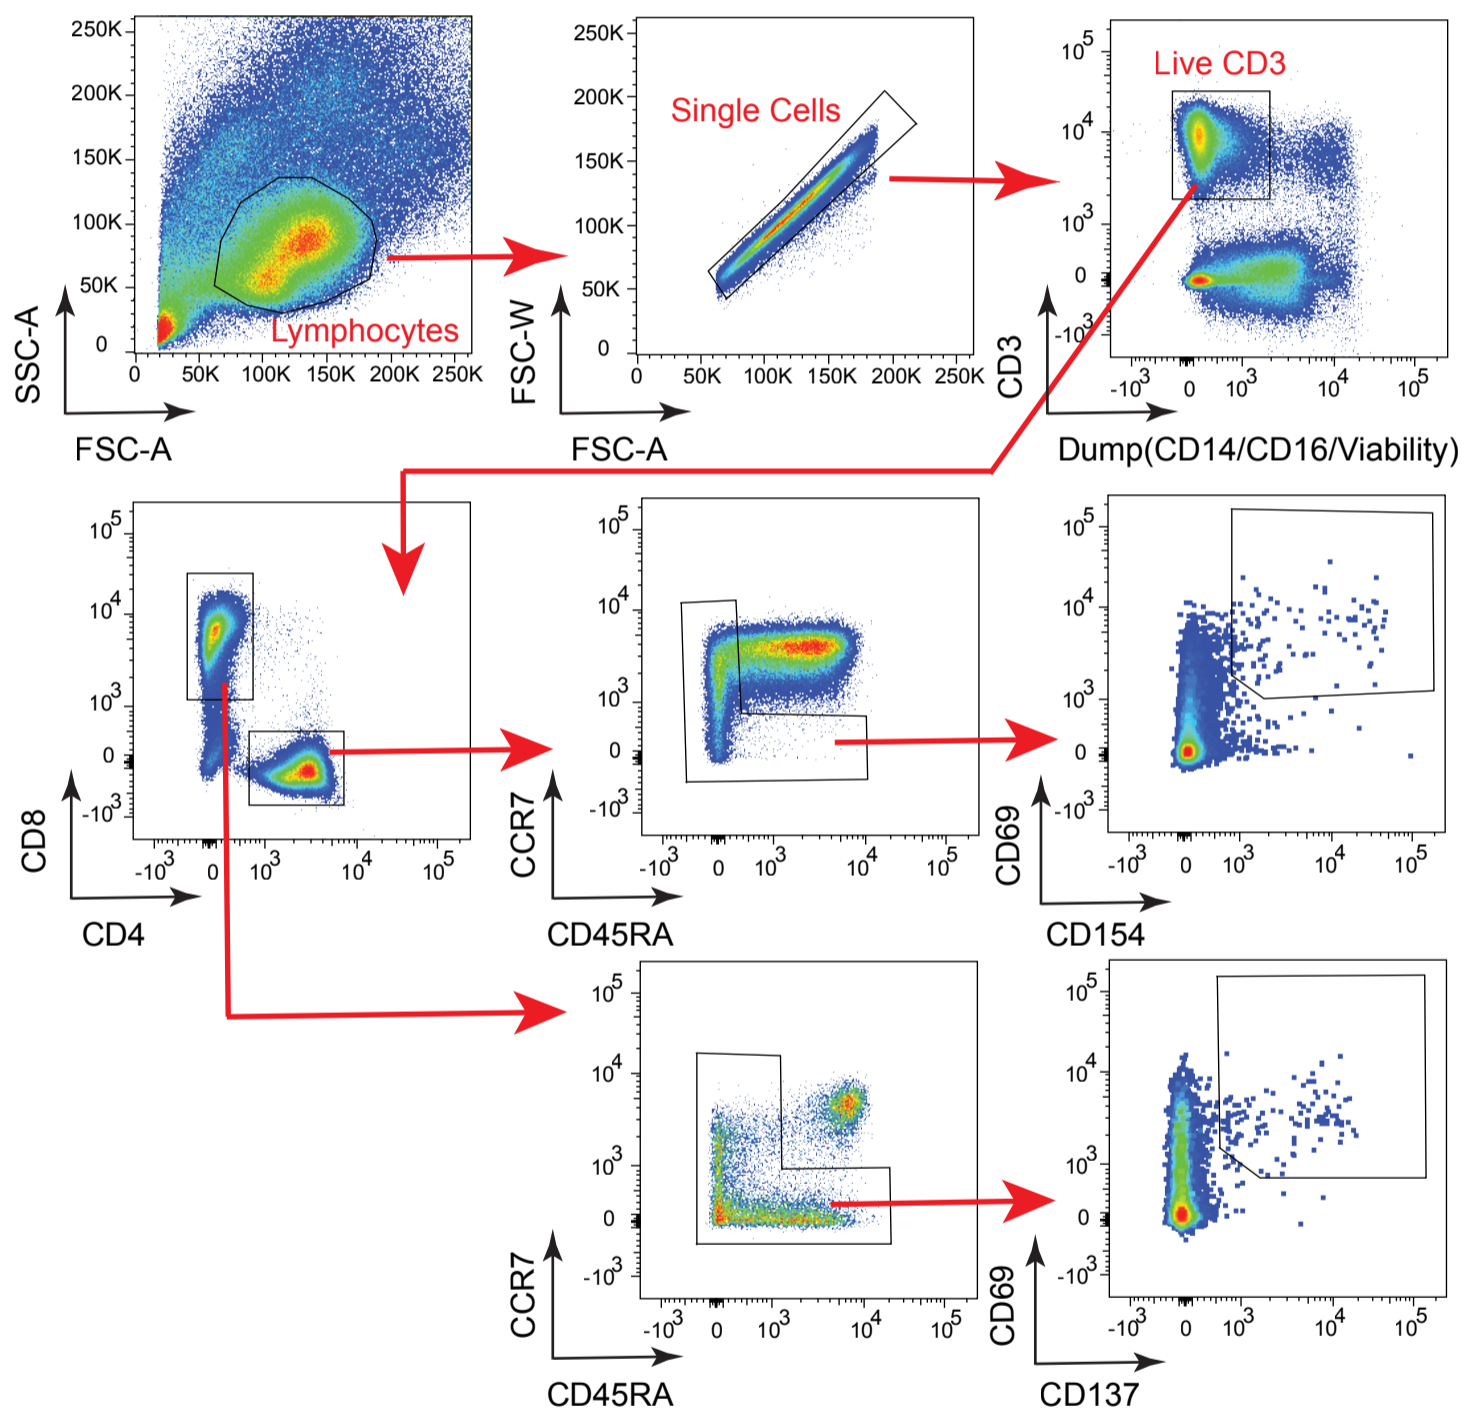

## Supplementary Figure S7

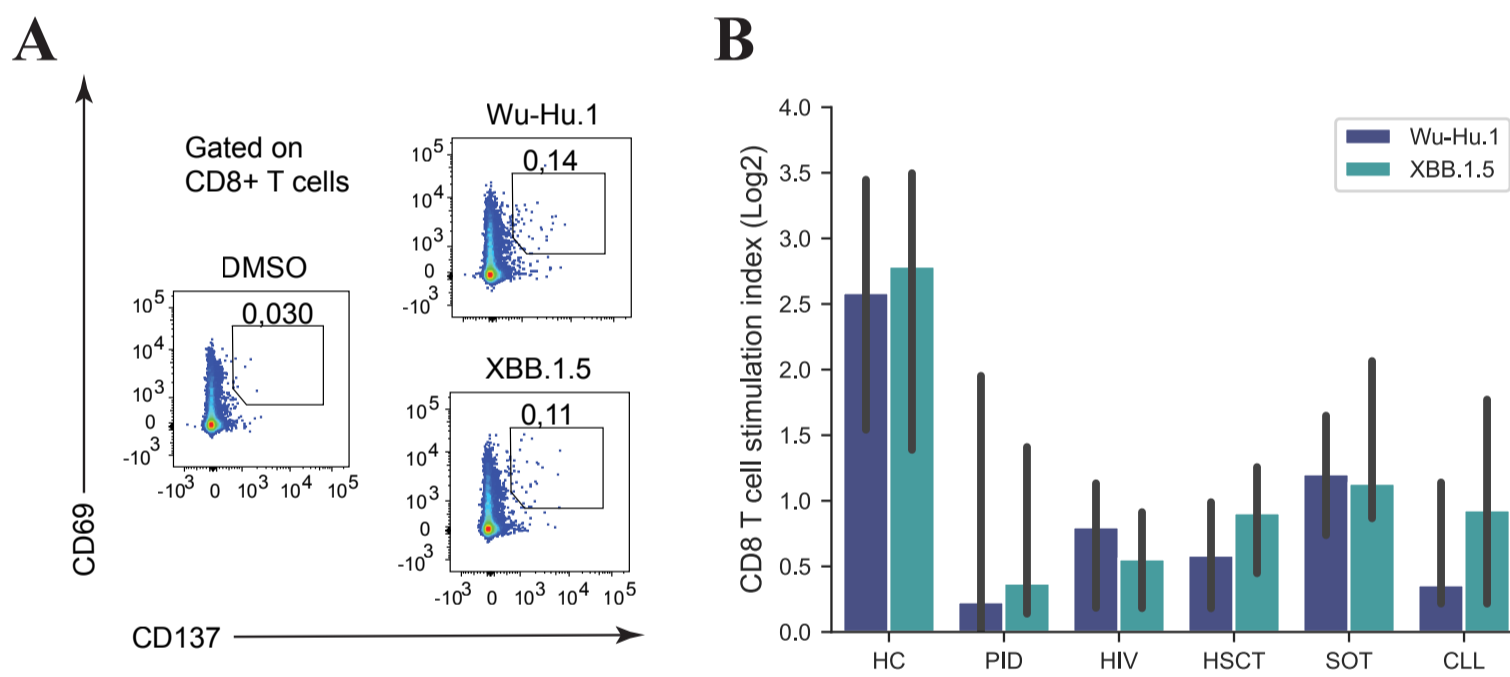

| fig           | wp   | wpsub     | comp_1          | comp_2                | p-value |
|---------------|------|-----------|-----------------|-----------------------|---------|
| Figure 1C     | HC   | N/A       | 3m              | 24m                   | <0.0001 |
| Figure 1C     | HC   | N/A       | 6m              | 24m                   | <0.0001 |
| Figure 1C     | HC   | N/A       | 9m              | 24m                   | 0.9028  |
| Figure 1C     | HC   | N/A       | 12m             | 24m                   | 0.5611  |
| Figure 1C     | HC   | N/A       | 18m             | 24m                   | 0.2923  |
| Figure 1C     | PID  | N/A       | 3m              | 24m                   | <0.0001 |
| Figure 1C     | PID  | N/A       | 6m              | 24m                   | <0.0001 |
| Figure 1C     | PID  | N/A       | 9m              | 24m                   | <0.0001 |
| Figure 1C     | PID  | N/A       | 12m             | 24m                   | 0.0044  |
| Figure 1C     | PID  | N/A       | 18m             | 24m                   | 0.1146  |
| Figure 1C     | HIV  | N/A       | 3m              | 24m                   | <0.0001 |
| Figure 1C     | HIV  | N/A       | 6m              | 24m                   | <0.0001 |
| Figure 1C     | HIV  | N/A       | 9m              | 24m                   | 0.2906  |
| Figure 1C     | HIV  | N/A       | 12m             | 24m                   | 0.3473  |
| Figure 1C     | HIV  | N/A       | 18m             | 24m                   | 0.4874  |
| Figure 1C     | HSCT | N/A       | 3m              | 24m                   | <0.0001 |
| Figure 1C     | HSCT | N/A       | 6m              | 24m                   | <0.0001 |
| Figure 1C     | HSCT | N/A       | 9m              | 24m                   | 0.0001  |
| Figure 1C     | HSCT | N/A       | 12m             | 24m                   | 0.8815  |
| Figure 1C     | HSCT | N/A       | 18m             | 24m                   | 0.4034  |
| Figure 1C     | SOT  | N/A       | 3m              | 24m                   | <0.0001 |
| Figure 1C     | SOT  | N/A       | 6m              | 24m                   | <0.0001 |
| Figure 1C     | SOT  | N/A       | 9m              | 24m                   | <0.0001 |
| Figure 1C     | SOT  | N/A       | 12m             | 24m                   | 0.5258  |
| Figure 1C     | SOT  | N/A       | 18m             | 24m                   | 0.4381  |
| Figure 1C     | CLL  | N/A       | 3m              | 24m                   | <0.0001 |
| Figure 1C     | CLL  | N/A       | 6m              | 24m                   | <0.0001 |
| Figure 1C     | CLL  | N/A       | 9m              | 24m                   | <0.0001 |
| Figure 1C     | CLL  | N/A       | 12m             | 24m                   | 0.0702  |
| Figure 1C     | CLL  | N/A       | 18m             | 24m                   | 0.5371  |
| Figure 2C     | HC   | N/A       | Spike (Wu-Hu.1) | Spike (B1.1.529;BA.1) | <0.0001 |
| Figure 2C     | HC   | N/A       | Spike (Wu-Hu.1) | Spike (BQ.1)          | <0.0001 |
| Figure 2C     | HC   | N/A       | Spike (Wu-Hu.1) | Spike (XBB.1.5)       | <0.0001 |
| Figure 2C     | PID  | N/A       | Spike (Wu-Hu.1) | Spike (B1.1.529;BA.1) | <0.0001 |
| Figure 2C     | PID  | N/A       | Spike (Wu-Hu.1) | Spike (BQ.1)          | <0.0001 |
| Figure 2C     | PID  | N/A       | Spike (Wu-Hu.1) | Spike (XBB.1.5)       | <0.0001 |
| Figure 2C     | HIV  | N/A       | Spike (Wu-Hu.1) | Spike (B1.1.529;BA.1) | <0.0001 |
| Figure 2C     | HIV  | N/A       | Spike (Wu-Hu.1) | Spike (BQ.1)          | <0.0001 |
| Figure 2C     | HIV  | N/A       | Spike (Wu-Hu.1) | Spike (XBB.1.5)       | <0.0001 |
| Figure 2C     | HSCT | N/A       | Spike (Wu-Hu.1) | Spike (B1.1.529;BA.1) | <0.0001 |
| Figure 2C     | HSCT | N/A       | Spike (Wu-Hu.1) | Spike (BQ.1)          | <0.0001 |
| Figure 2C     | HSCT | N/A       | Spike (Wu-Hu.1) | Spike (XBB.1.5)       | <0.0001 |
| Figure 2C     | SOT  | N/A       | Spike (Wu-Hu.1) | Spike (B1.1.529;BA.1) | <0.0001 |
| Figure 2C     | SOT  | N/A       | Spike (Wu-Hu.1) | Spike (BQ.1)          | 0.0012  |
| Figure 2C     | SOT  | N/A       | Spike (Wu-Hu.1) | Spike (XBB.1.5)       | <0.0001 |
| Figure 2C     | CLL  | N/A       | Spike (Wu-Hu.1) | Spike (B1.1.529;BA.1) | <0.0001 |
| Figure 2C     | CLL  | N/A       | Spike (Wu-Hu.1) | Spike (BQ.1)          | <0.0001 |
| Figure 2C     | CLL  | N/A       | Spike (Wu-Hu.1) | Spike (XBB.1.5)       | <0.0001 |
| Supp Figure 2 | HC   | >60 yrs   | 3m              | 24m                   | <0.0001 |
| Supp Figure 2 | HC   | >60 yrs   | 6m              | 24m                   | <0.0001 |
| Supp Figure 2 | HC   | >60 yrs   | 9m              | 24m                   | 0.1115  |
| Supp Figure 2 | HC   | >60 yrs   | 12m             | 24m                   | 0.2154  |
| Supp Figure 2 | HC   | >60 yrs   | 18m             | 24m                   | 0.4732  |
| Supp Figure 2 | HC   | 40-59 yrs | 3m              | 24m                   | <0.0001 |
| Supp Figure 2 | HC   | 40-59 yrs | 6m              | 24m                   | <0.0001 |
| Supp Figure 2 | HC   | 40-59 yrs | 9m              | 24m                   | 0.4835  |
| Supp Figure 2 | HC   | 40-59 yrs | 12m             | 24m                   | 0.7248  |
| Supp Figure 2 | HC   | 40-59 yrs | 18m             | 24m                   | 0.3432  |
| Supp Figure 2 | HC   | 18-39 yrs | 3m              | 24m                   | <0.0001 |
| Supp Figure 2 | HC   | 18-39 yrs | 6m              | 24m                   | <0.0001 |
| Supp Figure 2 | HC   | 18-39 yrs | 9m              | 24m                   | 0.6997  |
| Supp Figure 2 | HC   | 18-39 yrs | 12m             | 24m                   | 0.7870  |
| Supp Figure 2 | HC   | 18-39 yrs | 18m             | 24m                   | 1.0000  |
| Supp Figure 2 | PID  | CVID      | 3m              | 24m                   | <0.0001 |
| Supp Figure 2 | PID  | CVID      | 6m              | 24m                   | <0.0001 |
| Supp Figure 2 | PID  | CVID      | 9m              | 24m                   | <0.0001 |
| Supp Figure 2 | PID  | CVID      | 12m             | 24m                   | <0.0001 |
| Supp Figure 2 | PID  | CVID      | 18m             | 24m                   | 0.0084  |
| Supp Figure 2 | PID  | XLA       | 3m              | 24m                   | 0.1333  |
| Supp Figure 2 | PID  | XLA       | 6m              | 24m                   | 0.5333  |
| Supp Figure 2 | PID  | XLA       | 9m              | 24m                   | 0.3333  |
| Supp Figure 2 | PID  | XLA       | 12m             | 24m                   | 0.3333  |



|               |      |                   |     |     |         |
|---------------|------|-------------------|-----|-----|---------|
| Supp Figure 2 | PID  | XLA               | 18m | 24m | 0.3333  |
| Supp Figure 2 | PID  | Monogenic disease | 3m  | 24m | 0.0411  |
| Supp Figure 2 | PID  | Monogenic disease | 6m  | 24m | 0.0426  |
| Supp Figure 2 | PID  | Monogenic disease | 9m  | 24m | 0.1775  |
| Supp Figure 2 | PID  | Monogenic disease | 12m | 24m | 1.0000  |
| Supp Figure 2 | PID  | Monogenic disease | 18m | 24m | 0.5887  |
| Supp Figure 2 | PID  | CD4-cytopenia     | 3m  | 24m | 0.0006  |
| Supp Figure 2 | PID  | CD4-cytopenia     | 6m  | 24m | 0.0003  |
| Supp Figure 2 | PID  | CD4-cytopenia     | 9m  | 24m | 0.2453  |
| Supp Figure 2 | PID  | CD4-cytopenia     | 12m | 24m | 0.7513  |
| Supp Figure 2 | PID  | CD4-cytopenia     | 18m | 24m | 0.5495  |
| Supp Figure 2 | PID  | Other             | 3m  | 24m | 0.0154  |
| Supp Figure 2 | PID  | Other             | 6m  | 24m | <0.0001 |
| Supp Figure 2 | PID  | Other             | 9m  | 24m | 0.2086  |
| Supp Figure 2 | PID  | Other             | 12m | 24m | 0.2593  |
| Supp Figure 2 | PID  | Other             | 18m | 24m | 0.1649  |
| Supp Figure 2 | HIV  | ≤CD4 300          | 3m  | 24m | <0.0001 |
| Supp Figure 2 | HIV  | ≤CD4 300          | 6m  | 24m | <0.0001 |
| Supp Figure 2 | HIV  | ≤CD4 300          | 9m  | 24m | 0.5316  |
| Supp Figure 2 | HIV  | ≤CD4 300          | 12m | 24m | 0.7237  |
| Supp Figure 2 | HIV  | ≤CD4 300          | 18m | 24m | 0.1749  |
| Supp Figure 2 | HIV  | >CD4 300          | 3m  | 24m | <0.0001 |
| Supp Figure 2 | HIV  | >CD4 300          | 6m  | 24m | <0.0001 |
| Supp Figure 2 | HIV  | >CD4 300          | 9m  | 24m | 0.3674  |
| Supp Figure 2 | HIV  | >CD4 300          | 12m | 24m | 0.1934  |
| Supp Figure 2 | HIV  | >CD4 300          | 18m | 24m | 0.9318  |
| Supp Figure 2 | HSCT | Early             | 3m  | 24m | 0.0727  |
| Supp Figure 2 | HSCT | Early             | 6m  | 24m | 0.0242  |
| Supp Figure 2 | HSCT | Early             | 9m  | 24m | 0.4857  |
| Supp Figure 2 | HSCT | Early             | 12m | 24m | 0.2571  |
| Supp Figure 2 | HSCT | Early             | 18m | 24m | 0.7619  |
| Supp Figure 2 | HSCT | Intermediate      | 3m  | 24m | <0.0001 |
| Supp Figure 2 | HSCT | Intermediate      | 6m  | 24m | <0.0001 |
| Supp Figure 2 | HSCT | Intermediate      | 9m  | 24m | 0.0653  |
| Supp Figure 2 | HSCT | Intermediate      | 12m | 24m | 0.2766  |
| Supp Figure 2 | HSCT | Intermediate      | 18m | 24m | 0.0830  |
| Supp Figure 2 | HSCT | Late              | 3m  | 24m | <0.0001 |
| Supp Figure 2 | HSCT | Late              | 6m  | 24m | <0.0001 |
| Supp Figure 2 | HSCT | Late              | 9m  | 24m | 0.0007  |
| Supp Figure 2 | HSCT | Late              | 12m | 24m | 0.6989  |
| Supp Figure 2 | HSCT | Late              | 18m | 24m | 0.5953  |
| Supp Figure 2 | HSCT | CAR-T             | 3m  | 24m | 0.6667  |
| Supp Figure 2 | HSCT | CAR-T             | 6m  | 24m | 0.5000  |
| Supp Figure 2 | HSCT | CAR-T             | 9m  | 24m | 1.0000  |
| Supp Figure 2 | HSCT | CAR-T             | 12m | 24m | 1.0000  |
| Supp Figure 2 | HSCT | CAR-T             | 18m | 24m | 1.0000  |
| Supp Figure 2 | SOT  | ≤6mo w/ MMF       | 3m  | 24m | <0.0001 |
| Supp Figure 2 | SOT  | ≤6mo w/ MMF       | 6m  | 24m | <0.0001 |
| Supp Figure 2 | SOT  | ≤6mo w/ MMF       | 9m  | 24m | 0.0034  |
| Supp Figure 2 | SOT  | ≤6mo w/ MMF       | 12m | 24m | 0.1292  |
| Supp Figure 2 | SOT  | ≤6mo w/ MMF       | 18m | 24m | 0.7434  |
| Supp Figure 2 | SOT  | >6mo w/ MMF       | 3m  | 24m | <0.0001 |
| Supp Figure 2 | SOT  | >6mo w/ MMF       | 6m  | 24m | 0.0001  |
| Supp Figure 2 | SOT  | >6mo w/ MMF       | 9m  | 24m | 0.0082  |
| Supp Figure 2 | SOT  | >6mo w/ MMF       | 12m | 24m | 0.8918  |
| Supp Figure 2 | SOT  | >6mo w/ MMF       | 18m | 24m | 0.4817  |
| Supp Figure 2 | SOT  | >6mo w/o MMF      | 3m  | 24m | <0.0001 |
| Supp Figure 2 | SOT  | >6mo w/o MMF      | 6m  | 24m | <0.0001 |
| Supp Figure 2 | SOT  | >6mo w/o MMF      | 9m  | 24m | 0.0003  |
| Supp Figure 2 | SOT  | >6mo w/o MMF      | 12m | 24m | 0.6268  |
| Supp Figure 2 | SOT  | >6mo w/o MMF      | 18m | 24m | 0.8225  |
| Supp Figure 2 | CLL  | Ibrutinib         | 3m  | 24m | <0.0001 |
| Supp Figure 2 | CLL  | Ibrutinib         | 6m  | 24m | <0.0001 |
| Supp Figure 2 | CLL  | Ibrutinib         | 9m  | 24m | 0.0010  |
| Supp Figure 2 | CLL  | Ibrutinib         | 12m | 24m | 0.0158  |
| Supp Figure 2 | CLL  | Ibrutinib         | 18m | 24m | 0.3149  |
| Supp Figure 2 | CLL  | Off Ibrutinib     | 3m  | 24m | 0.0650  |
| Supp Figure 2 | CLL  | Off Ibrutinib     | 6m  | 24m | 0.0117  |
| Supp Figure 2 | CLL  | Off Ibrutinib     | 9m  | 24m | 0.3357  |
| Supp Figure 2 | CLL  | Off Ibrutinib     | 12m | 24m | 0.8785  |
| Supp Figure 2 | CLL  | Off Ibrutinib     | 18m | 24m | 0.4619  |
| Supp Figure 2 | CLL  | Indolent          | 3m  | 24m | <0.0001 |
| Supp Figure 2 | CLL  | Indolent          | 6m  | 24m | <0.0001 |

|               |      |                   |       |                       |         |
|---------------|------|-------------------|-------|-----------------------|---------|
| Supp Figure 2 | CLL  | Indolent          | 9m    | 24m                   | 0.0222  |
| Supp Figure 2 | CLL  | Indolent          | 12m   | 24m                   | 0.7096  |
| Supp Figure 2 | CLL  | Indolent          | 18m   | 24m                   | 0.5584  |
| Supp Figure 2 | CLL  | BR/FCR            | 3m    | 24m                   | <0.0001 |
| Supp Figure 2 | CLL  | BR/FCR            | 6m    | 24m                   | <0.0001 |
| Supp Figure 2 | CLL  | BR/FCR            | 9m    | 24m                   | <0.0001 |
| Supp Figure 2 | CLL  | BR/FCR            | 12m   | 24m                   | 0.0053  |
| Supp Figure 2 | CLL  | BR/FCR            | 18m   | 24m                   | 0.8035  |
| Supp Figure 4 | HC   | >60 yrs           | Spike | Spike (B1.1.529;BA.1) | <0.0001 |
| Supp Figure 4 | HC   | >60 yrs           | Spike | Spike (BQ.1)          | <0.0001 |
| Supp Figure 4 | HC   | >60 yrs           | Spike | Spike (XBB.1.5)       | <0.0001 |
| Supp Figure 4 | HC   | 40-59 yrs         | Spike | Spike (B1.1.529;BA.1) | <0.0001 |
| Supp Figure 4 | HC   | 40-59 yrs         | Spike | Spike (BQ.1)          | <0.0001 |
| Supp Figure 4 | HC   | 40-59 yrs         | Spike | Spike (XBB.1.5)       | <0.0001 |
| Supp Figure 4 | HC   | 18-39 yrs         | Spike | Spike (B1.1.529;BA.1) | 0.0001  |
| Supp Figure 4 | HC   | 18-39 yrs         | Spike | Spike (BQ.1)          | 0.0012  |
| Supp Figure 4 | HC   | 18-39 yrs         | Spike | Spike (XBB.1.5)       | 0.0006  |
| Supp Figure 4 | PID  | CVID              | Spike | Spike (B1.1.529;BA.1) | <0.0001 |
| Supp Figure 4 | PID  | CVID              | Spike | Spike (BQ.1)          | <0.0001 |
| Supp Figure 4 | PID  | CVID              | Spike | Spike (XBB.1.5)       | <0.0001 |
| Supp Figure 4 | PID  | XLA               | Spike | Spike (B1.1.529;BA.1) | 0.3333  |
| Supp Figure 4 | PID  | XLA               | Spike | Spike (BQ.1)          | 0.3333  |
| Supp Figure 4 | PID  | XLA               | Spike | Spike (XBB.1.5)       | 0.3333  |
| Supp Figure 4 | PID  | Monogenic disease | Spike | Spike (B1.1.529;BA.1) | 0.1797  |
| Supp Figure 4 | PID  | Monogenic disease | Spike | Spike (BQ.1)          | 0.2403  |
| Supp Figure 4 | PID  | Monogenic disease | Spike | Spike (XBB.1.5)       | 0.0931  |
| Supp Figure 4 | PID  | CD4-cytopenia     | Spike | Spike (B1.1.529;BA.1) | 0.0047  |
| Supp Figure 4 | PID  | CD4-cytopenia     | Spike | Spike (BQ.1)          | 0.0086  |
| Supp Figure 4 | PID  | CD4-cytopenia     | Spike | Spike (XBB.1.5)       | 0.0031  |
| Supp Figure 4 | PID  | Other             | Spike | Spike (B1.1.529;BA.1) | 0.0021  |
| Supp Figure 4 | PID  | Other             | Spike | Spike (BQ.1)          | 0.0070  |
| Supp Figure 4 | PID  | Other             | Spike | Spike (XBB.1.5)       | 0.0070  |
| Supp Figure 4 | HIV  | ≤CD4 300          | Spike | Spike (B1.1.529;BA.1) | 0.0007  |
| Supp Figure 4 | HIV  | ≤CD4 300          | Spike | Spike (BQ.1)          | 0.0017  |
| Supp Figure 4 | HIV  | <CD4 300          | Spike | Spike (XBB.1.5)       | 0.0007  |
| Supp Figure 4 | HIV  | ≤CD4 300          | Spike | Spike (B1.1.529;BA.1) | <0.0001 |
| Supp Figure 4 | HIV  | >CD4 300          | Spike | Spike (BQ.1)          | <0.0001 |
| Supp Figure 4 | HIV  | >CD4 300          | Spike | Spike (XBB.1.5)       | <0.0001 |
| Supp Figure 4 | HSCT | Early             | Spike | Spike (B1.1.529;BA.1) | 0.4857  |
| Supp Figure 4 | HSCT | Early             | Spike | Spike (BQ.1)          | 0.8857  |
| Supp Figure 4 | HSCT | Early             | Spike | Spike (XBB.1.5)       | 0.6857  |
| Supp Figure 4 | HSCT | Intermediate      | Spike | Spike (B1.1.529;BA.1) | 0.0148  |
| Supp Figure 4 | HSCT | Intermediate      | Spike | Spike (BQ.1)          | 0.0281  |
| Supp Figure 4 | HSCT | Intermediate      | Spike | Spike (XBB.1.5)       | 0.0281  |
| Supp Figure 4 | HSCT | Late              | Spike | Spike (B1.1.529;BA.1) | <0.0001 |
| Supp Figure 4 | HSCT | Late              | Spike | Spike (BQ.1)          | <0.0001 |
| Supp Figure 4 | HSCT | Late              | Spike | Spike (XBB.1.5)       | <0.0001 |
| Supp Figure 4 | HSCT | CAR-T             | Spike | Spike (B1.1.529;BA.1) | 1.0000  |
| Supp Figure 4 | HSCT | CAR-T             | Spike | Spike (BQ.1)          | 1.0000  |
| Supp Figure 4 | HSCT | CAR-T             | Spike | Spike (XBB.1.5)       | 1.0000  |
| Supp Figure 4 | SOT  | ≤6mo w/ MMF       | Spike | Spike (B1.1.529;BA.1) | 0.0135  |
| Supp Figure 4 | SOT  | ≤6mo w/ MMF       | Spike | Spike (BQ.1)          | 0.1904  |
| Supp Figure 4 | SOT  | ≤6mo w/ MMF       | Spike | Spike (XBB.1.5)       | 0.0326  |
| Supp Figure 4 | SOT  | >6mo w/ MMF       | Spike | Spike (B1.1.529;BA.1) | 0.0648  |
| Supp Figure 4 | SOT  | >6mo w/ MMF       | Spike | Spike (BQ.1)          | 0.0812  |
| Supp Figure 4 | SOT  | >6mo w/ MMF       | Spike | Spike (XBB.1.5)       | 0.0578  |
| Supp Figure 4 | SOT  | >6mo w/o MMF      | Spike | Spike (B1.1.529;BA.1) | 0.0079  |
| Supp Figure 4 | SOT  | >6mo w/o MMF      | Spike | Spike (BQ.1)          | 0.0056  |
| Supp Figure 4 | SOT  | >6mo w/o MMF      | Spike | Spike (XBB.1.5)       | 0.0021  |
| Supp Figure 4 | CLL  | Ibrutinib         | Spike | Spike (B1.1.529;BA.1) | 0.0157  |
| Supp Figure 4 | CLL  | Ibrutinib         | Spike | Spike (BQ.1)          | 0.2413  |
| Supp Figure 4 | CLL  | Ibrutinib         | Spike | Spike (XBB.1.5)       | 0.0258  |
| Supp Figure 4 | CLL  | Off Ibrutinib     | Spike | Spike (B1.1.529;BA.1) | 0.0308  |
| Supp Figure 4 | CLL  | Off Ibrutinib     | Spike | Spike (BQ.1)          | 0.1605  |
| Supp Figure 4 | CLL  | Off Ibrutinib     | Spike | Spike (XBB.1.5)       | 0.0830  |
| Supp Figure 4 | CLL  | Indolent          | Spike | Spike (B1.1.529;BA.1) | 0.0014  |
| Supp Figure 4 | CLL  | Indolent          | Spike | Spike (BQ.1)          | 0.0108  |
| Supp Figure 4 | CLL  | Indolent          | Spike | Spike (XBB.1.5)       | 0.0049  |
| Supp Figure 4 | CLL  | BR/FCR            | Spike | Spike (B1.1.529;BA.1) | 0.0032  |
| Supp Figure 4 | CLL  | BR/FCR            | Spike | Spike (BQ.1)          | 0.0055  |
| Supp Figure 4 | CLL  | BR/FCR            | Spike | Spike (XBB.1.5)       | 0.0016  |

Stable 1. Non-dichotomized p-values.
